# Supplementary material
Source: PubMed Central journal article supplement (PMC3839705)
Supplement: 1319247110_pnas.201319247SI.pdf [file 1319247110_pnas.201319247SI.pdf]

# Supporting Information

Andrews et al. 10.1073/pnas.1319247110

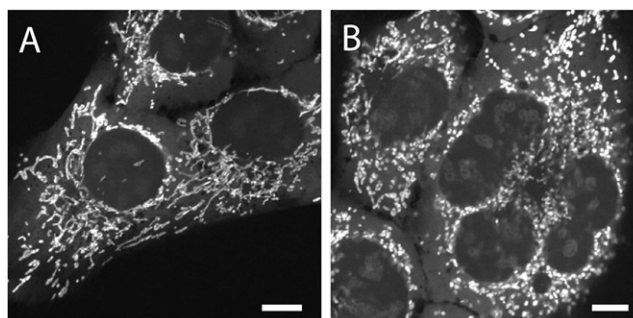

**Fig. S1.** Comparison of morphology of mitochondria in control cells and in cells in which expression of subunit NDUFA11 has been suppressed transiently. (A) Human 143B cells transfected with (A) control siRNA and (B) siRNA targeted against subunit NDUFA11. The cells were stained with MitoTracker 72 h after transfection, fixed, and visualized by confocal microscopy. (Scale bars, 10  $\mu\text{m}$ .)

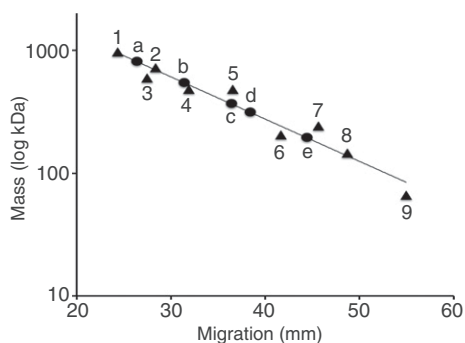

**Fig. S2.** Reestimation of molecular masses of subcomplexes of human complex I by blue native (BN)-PAGE. The gels were calibrated with the following proteins and protein complexes with their calculated molecular masses given in kilodaltons in parentheses: 1, bovine complex I (971); 2, apoferritin 1 (720); 3, bovine ATP synthase (597); 4, bovine complex III (482); 5, apoferritin 2 (480); 6, bovine complex IV (205); 7, B-phycoerythrin (242); 8, lactate dehydrogenase (146); and 9, BSA (66). ▲, standard proteins and complexes; ●, subcomplexes of complex I; their molecular masses as measured here are as follows, with previous estimates for a–d (1) in parentheses: a, 815 (830) kDa; b, 550 (650) kDa; c, 370 (460) kDa; d, 315 (400) kDa; and e, 200 kDa.

1. Mimaki M, Wang X, McKenzie M, Thorburn DR, Ryan MT (2012) Understanding mitochondrial complex I assembly in health and disease. *Biochim Biophys Acta* 1817(6):851–862.







## Other Supporting Information Files

[Dataset S1 \(XLSX\)](#)

[Dataset S2 \(XLSX\)](#)
